# Supplementary material
Source: Springer Nature journal article supplement (https://www.springermedizin.de/resource/supplementary/12955_2011_970_MOESM2_ESM.pdf/9558886)
Supplement: MOESM2 [file 9558886]

**Table 2** Characteristics of the men and women and the total sample at baseline

|                                                       |         | All                    | Men                    | Women                  |
|-------------------------------------------------------|---------|------------------------|------------------------|------------------------|
|                                                       | Scales  | <i>N</i> = 76          | <i>N</i> = 20          | <i>N</i> = 56          |
|                                                       |         | <i>M</i> ( <i>SD</i> ) | <i>M</i> ( <i>SD</i> ) | <i>M</i> ( <i>SD</i> ) |
| <i>Health behaviour</i>                               |         |                        |                        |                        |
| Levels of physical activity                           | 0 – 4   | 1.3 (0.9)              | 1.3 (0.7)              | 1.3 (1.0)              |
| <i>Environmental characteristics</i>                  |         |                        |                        |                        |
| Social support from close persons                     | 1 – 5   | 4.0 (1.0)              | 3.9 (0.9)              | 4.1 (1.0)              |
| <i>Personal factors</i>                               |         |                        |                        |                        |
| Self-esteem RSES-4<br>(high scores=lower self-esteem) | 4 – 16  | 9.3 (2.7)              | 8.9 (2.4)              | 9.4 (2.8)              |
| Self-efficacy (GSE)                                   | 1 – 40  | 27.2 (6.5)             | 27.6 (6.4)             | 27.1 (6.6)             |
| Coping style (BACQ) (avoidance as ref.)               | 12 – 60 | 38.6 (5.5)             | 38.7 (5.6)             | 38.5 (5.5)             |
| <i>Health perception</i>                              |         |                        |                        |                        |
| Illness impact (BIPQ)                                 | 1 – 10  | 7.4 (2.2)              | 7.0 (2.3)              | 7.5 (2.2)              |

No statistical significant differences between men and women on any of the variables by independent-samples *t*-tests.
